# Supplementary material for: Machine learning algorithms for mode-of-action classification in toxicity assessment
Source: PubMed Central journal article supplement (PMC4866020; doi:10.1186/s13040-016-0098-0), 2016-05-13
Supplement: 13040_2016_98_MOESM1_ESM.pdf [file 13040_2016_98_MOESM1_ESM.pdf]

## Additional File: 63 chemicals in 10 MOA clusters

| <b>Cluster I: DNA/RNA-Nucleic Acid Targets</b>                                      | Solvent          | Concentration(1:3)        |
|-------------------------------------------------------------------------------------|------------------|---------------------------|
| 5-Fluorouracil (5-FU)                                                               | DMSO             | 200 $\mu$ M to 3.39 nM    |
| Gemcitabine HCl                                                                     | H <sub>2</sub> O | 1650 $\mu$ M to 27.94 nM  |
| Etoposide phosphate                                                                 | DMSO             | 200 $\mu$ M to 3.39 nM    |
| Doxorubicin                                                                         | H <sub>2</sub> O | 100 $\mu$ M to 1.69 nM    |
| Merbarone                                                                           | DMSO             | 200 $\mu$ M to 3.39 nM    |
| Clofarabine                                                                         | H <sub>2</sub> O | 25 $\mu$ M to 0.42 nM     |
| Hydroxyurea                                                                         | H <sub>2</sub> O | 10 $\mu$ M to 169 nM      |
| SN-38                                                                               | DMSO             | 200 $\mu$ M to 3.39 nM    |
| Topotecan                                                                           | DMSO             | 95 $\mu$ M to 1.61 nM     |
| Irinotecan                                                                          | DMSO             | 160 $\mu$ M to 2.71 nM    |
| Cytosine                                                                            | H <sub>2</sub> O | 8950 $\mu$ M to 151.57 nM |
| ABT-888                                                                             | DMSO             | 308 $\mu$ M to 5.22 nM    |
| Mitoxantrone dihydrochloride                                                        | DMSO             | 150 $\mu$ M to 2.54 nM    |
| CRT0044876                                                                          | DMSO             | 194 $\mu$ M to 3.29 nM    |
| NU7026                                                                              | DMSO             | 20 $\mu$ M to 0.34 nM     |
| Mitomycin C                                                                         | DMSO             | 200 $\mu$ M to 3.39 nM    |
| Cordycepin                                                                          | DMSO             | 200 $\mu$ M to 3.39 nM    |
| Actinomycin D                                                                       | DMSO             | 2 $\mu$ M to 0.0339 nM    |
| Cisplatin                                                                           | H <sub>2</sub> O | 150 $\mu$ M to 2.54 nM    |
| Ochratoxin A                                                                        | DMSO             | 10 $\mu$ M to 0.17 nM     |
| <b>Cluster II: Transport Protein-Primary Activetransporter Targets</b>              | Solvent          | Concentration(1:3)        |
| Brefeldin A                                                                         | DMSO             | 40 $\mu$ M to 0.68 nM     |
| Exo 1                                                                               | DMSO             | 300 $\mu$ M to 5.08 nM    |
| Leptomycin B                                                                        | DMSO             | 20 nM to 0.000339 nM      |
| Concanamycin A                                                                      | DMSO             | 0.2 $\mu$ M to 0.003 nM   |
| Thapsigargin                                                                        | DMSO             | 2 $\mu$ M to 0.0339 nM    |
| BHQ                                                                                 | DMSO             | 400 $\mu$ M to 7 nM       |
| <b>Cluster III: Protein-Actin Targets</b>                                           |                  |                           |
| Bafilomycin A1                                                                      | DMSO             | 0.3212 $\mu$ M to 0.01 nM |
| Cytochalasin D                                                                      | DMSO             | 20 $\mu$ M to 0.339 nM    |
| Cytochalasin B                                                                      | DMSO             | 20 $\mu$ M to 0.339 nM    |
| Latrunculin A                                                                       | DMSO             | 2 $\mu$ M to 0.0339 nM    |
| Latrunculin B                                                                       | DMSO             | 2 $\mu$ M to 0.0339 nM    |
| <b>Cluster IV: Protein-Tubulin Targets</b>                                          |                  |                           |
| Docetaxel                                                                           | DMSO             | 1 $\mu$ M to 0.02 nM      |
| Paclitaxel                                                                          | DMSO             | 20 $\mu$ M to 0.339 nM    |
| Vincristine Sulfate                                                                 | H <sub>2</sub> O | 250 $\mu$ M to 4.23 nM    |
| Vinblastine sulfate                                                                 | H <sub>2</sub> O | 40 $\mu$ M to 0.68 nM     |
| <b>Cluster V: Ribosome-50S Subunit Targets</b>                                      |                  |                           |
| Emetine                                                                             | H <sub>2</sub> O | 50 $\mu$ M to 0.847 nM    |
| Puromycin                                                                           | H <sub>2</sub> O | 1000 $\mu$ M to 17 nM     |
| Anisomycin                                                                          | H <sub>2</sub> O | 10 $\mu$ M to 0.17 nM     |
| <b>Cluster VI: Transport Proteins-Electrochemical Potential-driven Transporters</b> |                  |                           |
| Oligomycin                                                                          | DMSO             | 20 $\mu$ M to 0.339 nM    |
| Antimycin A                                                                         | DMSO             | 200 $\mu$ M to 3.387 nM   |
| Rotenone                                                                            | DMSO             | 200 $\mu$ M to 3.387 nM   |
| CCCP                                                                                | DMSO             | 100 $\mu$ M to 1.69 nM    |

| <b>Cluster VII: Ion Channel Targets</b>  | Solvent          | Concentration(1:3)       |
|------------------------------------------|------------------|--------------------------|
| Valproic acid                            | H <sub>2</sub> O | 50 mM to 847 nM          |
| BAPT-am                                  | DMSO             | 60 $\mu$ M to 1 nM       |
| <b>Cluster VIII: Enzyme Targets</b>      |                  |                          |
| Cyclosporin A                            | DMSO             | 100 $\mu$ M to 1.69 nM   |
| FK-506                                   | DMSO             | 50 $\mu$ M to 1 nM       |
| (S)-HDAC-42                              | DMSO             | 128 $\mu$ M to 2.17 nM   |
| SAHA                                     | DMSO             | 151 $\mu$ M to 2.56 nM   |
| W7 HCl                                   | DMSO             | 200 $\mu$ M to 3.39 nM   |
| <b>Cluster IX: Receptors</b>             |                  |                          |
| benzo[a]pyrene                           | DMSO             | 100 $\mu$ M to 1.69 nM   |
| <b>Cluster X: Protein- Motor Targets</b> |                  |                          |
| Monastrol                                | DMSO             | 100 $\mu$ M to 1.69 nM   |
| S-trityl-cysteine                        | DMSO             | 100 $\mu$ M to 1.69 nM   |
| Dimethylnastron                          | DMSO             | 40 $\mu$ M to 0.68 nM    |
| Y-27632                                  | DMSO             | 188 $\mu$ M to 3.18 nM   |
| HA1100 hydrochloride                     | H <sub>2</sub> O | 1000 $\mu$ M to 16.94 nM |
| Ro32-3555                                | DMSO             | 200 $\mu$ M to 3.39 nM   |
| Batimastat                               | DMSO             | 200 $\mu$ M to 3.39 nM   |
| MLCKInhibPep18                           | H <sub>2</sub> O | 94.5 $\mu$ M to 1.6 nM   |
| Blebbistatin                             | DMSO             | 100 $\mu$ M to 1.69 nM   |
| ML7 hydrochloride                        | DMSO             | 100 $\mu$ M to 1.69 nM   |
| FAKInhibitor14                           | H <sub>2</sub> O | 2500 $\mu$ M to 42.34 nM |
| PF573228                                 | DMSO             | 40 $\mu$ M to 0.68 nM    |
| PF431396                                 | DMSO             | 5 $\mu$ M to 0.08 nM     |
